# Supplementary material
Source: PubMed Central journal article supplement (PMC3594540)
Supplement: NIHMS430199-supplement-1.pdf [file NIHMS430199-supplement-1.pdf]

**SUPPLEMENTARY INFORMATION**

**Full-Length  $G\alpha_q$ -Phospholipase C- $\beta 3$  Structure Reveals Interfaces of  
the C-terminal Coiled-Coil Domain**

**Angeline M. Lyon, Somnath Dutta, Cassandra A. Boguth, Georgios Skiniotis,  
and John J. G. Tesmer**



|        |     |                                                                            |     |     |     |
|--------|-----|----------------------------------------------------------------------------|-----|-----|-----|
|        |     |                                                                            | 876 | 882 |     |
| PLCβ3  | 846 | DYIPDDHQDYAEALINPIKHSVLSMDQRRARQLAALIGESEAQAGQETCQDTSQQLGSPSSNPSPPLDAS     |     |     | 916 |
| RPLCβ1 | 797 | DYVPDITYADVIEALSNIPIRYVNLMEQRAKQLAALTLEDEEEVKKEADPGETSSSEAPSETRTTPAENGVNHT |     |     | 867 |
| PLCβ1  | 792 | DYVPDITYADVIEALSNIPIRYVNLMEQRAKQLAALTLEDEEEVKKEADPGETSPSEAPSEARTTPAENGVNHT |     |     | 862 |
| PLCβ2  | 803 | DYIPGAWADLTVALANPIKFFSAHDTKSVLKEAMGGLPEKP-----FPLASPVASQ                   |     |     | 854 |
| PLCβ4  | 822 | TYVPDGFQDIDVALSDPKKFLSITEKRADQMRAMGIETSDIADVPDTS-----KNDKKGKANT            |     |     | 880 |
| MPLCβ  | 801 | DYVPDAWADLTIALSNPIKFFNLQEKRSVNLKD--GSEVERPDMQRNF-----SFPENNGIPES           |     |     | 857 |



|        |     |                                                                           |     |  |     |
|--------|-----|---------------------------------------------------------------------------|-----|--|-----|
|        |     |                                                                           | 937 |  |     |
| PLCβ3  | 917 | PRRPPGP-----TTSFASTLSLSPGQRDDLIASILSEVAPTPLELIRGHKALVKLRSRQERDLRELRKKHQ   |     |  | 982 |
| RPLCβ1 | 868 | ATLAPKPPSQAPHSQPAPGSVKAPAKTEDLIQSVLTEVEAQTIEELKQKSFVKLQKKHYKEMKDLVKRHH    |     |  | 938 |
| PLCβ1  | 863 | TTLTPKPPSQALHSQPAPGSVKAPAKTEDLIQSVLTEVEAQTIEELKQKSFVKLQKKHYKEMKDLVKRHH    |     |  | 933 |
| PLCβ2  | 855 | VNGALP-----TSNGSPAARAGAREEAMKEA---AEPRTASLEELRELKGVVQLQRRHEKLELELRGA      |     |  | 917 |
| PLCβ4  | 881 | AKANVTPQ-----SSELRPTTTAALASGVEAKKGLIELIPQVRIEDLKQMKAYLKHLLKQKQKELNSLKKKHA |     |  | 947 |
| MPLCβ  | 858 | TRIFSTP-----FANGPAGAAALVKDGNMKEVTQLPEPQTASLAELOQMKLFLKLLKQEKELKELERKGS    |     |  | 923 |




|        |     |                                                                         |  |  |      |
|--------|-----|-------------------------------------------------------------------------|--|--|------|
| PLCβ3  | 983 | RKAVTLTRRLDGLAQAQAEGRCLRPGALGGAADVEDTKE-----GEDEAKRYQEF                 |  |  | 1034 |
| RPLCβ1 | 939 | KKTTELIKEHTTKYNEIQNDYLRRRAALEKSAKKDSKKKSEPPSPDHGSSAIEQDLA-ALDAEMTQKLIDL |  |  | 1008 |
| PLCβ1  | 934 | KKTTELIKEHTTKYNEIQNDYLRRRAALEKSAKKDSKKKSEPPSPDHGSSAIEQDLA-ALDAEMTQKLIDL |  |  | 1003 |
| PLCβ2  | 918 | RRWEELLQRGAAQLAELGPPGVGGVACKLGPCKGSRKRSRSLPR-EESAGAAPGEG---PEGVDGRVREL  |  |  | 983  |
| PLCβ4  | 948 | KEHSTMQLHCTQVDKIVAQYDKEKSTHEKILEKAMKKKGGSNCLEMKKETEIKIQT--LTSDHKSKVKEI  |  |  | 1016 |
| MPLCβ  | 924 | KRREELLQKYSVLFLEPVYP---RGKKRSMHSRKTQKKRSLTTGDVGTQMOPVEM---AEKLDSSQVVEL  |  |  | 986  |




|        |      |                                                                         |  |  |      |
|--------|------|-------------------------------------------------------------------------|--|--|------|
| PLCβ3  | 1035 | QNRQVQSLLLELREAQVDAEAQRRLHLRQALQRLREVVLDANTTQFKRLKEMNEREKKELOKILDRKRHNS |  |  | 1105 |
| RPLCβ1 | 1009 | KDKQQQLLNLRQEQYSEKYQKREHIKLLIQKLTDAECCONNQLKKEICEKEKELKMKMDKKRQEK       |  |  | 1079 |
| PLCβ1  | 1004 | KDKQQQLLNLRQEQYSEKYQKREHIKLLIQKLTDAECCONNQLKKEICEKEKELKMKMDKKRQEK       |  |  | 1074 |
| PLCβ2  | 984  | KDRLELELLRQEGEEQYECVLRKKEQHVAEQISKMMELAREKQAELKALKETSSENDTKEMKKLETKRLER |  |  | 1054 |
| PLCβ4  | 1017 | VAQHTKEWSEMINTHSAEEQEIRDHLHSQQCELLKLLINAHEQQTQQLKLSHDRESKEMRAHQAKISMS   |  |  | 1088 |
| MPLCβ  | 987  | KERLEMELIHLGEYHDGIRRRKEQHATEQTAKITELAREKQIAELKALKESESSENIKDIKKKLEAKRLDR |  |  | 1057 |




|        |      |                                                                       |      |      |      |      |
|--------|------|-----------------------------------------------------------------------|------|------|------|------|
|        |      |                                                                       | 1129 | 1133 | 1136 |      |
| PLCβ3  | 1106 | ISEAK---MRDKHKKEAELTEINRRHITESVNSIRLEEAKQRHDLRIVAGQQVQLQQLAEPEPKLLAQL |      |      |      | 1172 |
| RPLCβ1 | 1080 | ITEAK---SKDKSQMEEKTEMIRSYIQEVVQYIKRLEEAQSKRQEKLVKHKKEIRQQILDEKPKLQVEL |      |      |      | 1146 |
| PLCβ1  | 1075 | ITEAK---SKDKSQMEEKTEMIRSYIQEVVQYIKRLEEAQSKRQEKLVKHKKEIRQQILDEKPKLQVEL |      |      |      | 1141 |
| PLCβ2  | 1055 | IQGMT-KVTTDKMAQERLKRINNHSIQEVVQVIKQMTENLERHQEKLEEKQAACLEQIREMEKQFQKEA |      |      |      | 1123 |
| PLCβ4  | 1089 | KAISQDKSIKNAERERRVRELNSSNTKFLERKRLAMQSKEMDQLKKVQLEHLEFLEKQNEQAKEMQ    |      |      |      | 1158 |
| MPLCβ  | 1058 | IQVMM-RSTSDKAAQERLKRINNHSIQEVVQTIKLLTEKTARYQQKLEEKQAENLRAIQEKEGQLQQA  |      |      |      | 1126 |




|        |      |                             |  |  |      |
|--------|------|-----------------------------|--|--|------|
| PLCβ3  | 1173 | AQEQEQRARLPQEIIRRSLLGEMPEGL |  |  | 1199 |
| RPLCβ1 | 1147 | EQEYQDKFKRLPLELLEFVQEAAMKGV |  |  | 1173 |
| PLCβ1  | 1142 | EQEYQDKFKRLPLELLEFVQEAAMKGI |  |  | 1168 |
| PLCβ2  | 1124 | LAEYEARMKGLEAEVKESVRACLRTCF |  |  | 1150 |
| PLCβ4  | 1160 | MVKLEAEMD-RRPATVV           |  |  | 1175 |
| MPLCβ  | 1127 | VAEYEEKLKTITVEVQEMVKNYKVEVF |  |  | 1153 |



**Supplementary Figure 1.** Sequence alignment and conservation of CTDs from PLC $\beta$  isozymes. Secondary structure of the distal CTDs from human PLC $\beta$ 3 and turkey PLC $\beta$  (from PDB entry 1JAD<sup>26</sup>) are shown above and below the primary sequence, respectively, with rounded rectangles representing helices, and dashed lines indicating disordered regions in PLC $\beta$ 3 or engineered deletions in turkey. Residues that were mutated in this study, or that mark the ends of the CTD linker deletion, are denoted by black circles with the corresponding residue number for PLC $\beta$ 3 above the alignment. Gray boxes indicate conserved hydrophobic residues. Light blue boxes indicate the conserved basic residues that form the basic ridge proposed to interact with membranes. Yellow boxes indicate the conserved hydrophobic patch. Residues colored red are those mutated by Kim *et al* that impaired G $\alpha_q$ -dependent activation and particulate association<sup>21</sup>. Residues boxed in green are tracts mutated by Ilkaeva *et al* that impaired G $\alpha_q$ -dependent activation and GAP activity<sup>27</sup>. Species and Genbank entry numbers for the sequences are as follows: PLC $\beta$ 3 (*H. sapiens* PLC $\beta$ 3, NM\_000932), RPLC $\beta$ 1 (*R. norvegicus* PLC $\beta$ 1, NP\_001071109), PLC $\beta$ 1 (*H. sapiens* PLC $\beta$ 1, AAF86613), PLC $\beta$ 2 (*H. sapiens* PLC $\beta$ 2, NP\_004564), PLC $\beta$ 4 (*H. sapiens* PLC $\beta$ 4, AAI17459), and MPLC $\beta$  (*M. gallopavo* PLC $\beta$ , AAC60011).



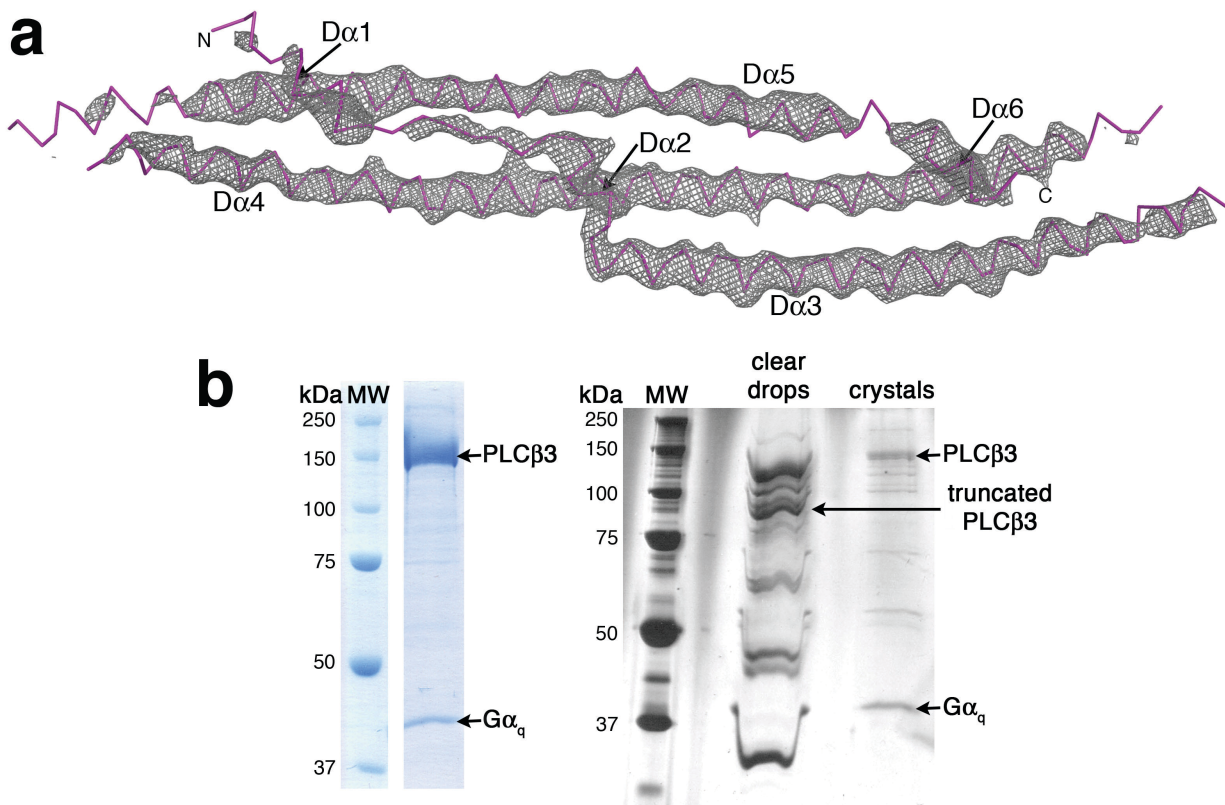

**Supplementary Figure 3.** Crystals of  $G\alpha_q$ -PLC $\beta$ 3 contain full-length PLC $\beta$ 3. **(a)** Strong electron density is observed for the backbone of the distal CTD. An  $m|F_o| - D|F_c|$  omit map contoured at  $3\sigma$  for the distal CTD is shown as a gray cage. This view is similar to that shown in **Fig. 2a**. **(b)** SDS-PAGE analysis of  $G\alpha_q$ -PLC $\beta$ 3 isolated by gel filtration, stained with Coomassie blue (left), and from crystals, silver-stained (right). Crystals were harvested and dissolved in SDS loading dye prior to loading on a 10% acrylamide gel. Hanging drops without crystals were harvested as controls (“clear drops”). The high concentration of PEG 3350 and sodium chloride in the hanging drops alter the rate of protein migration. MW, molecular weight markers.

**a**

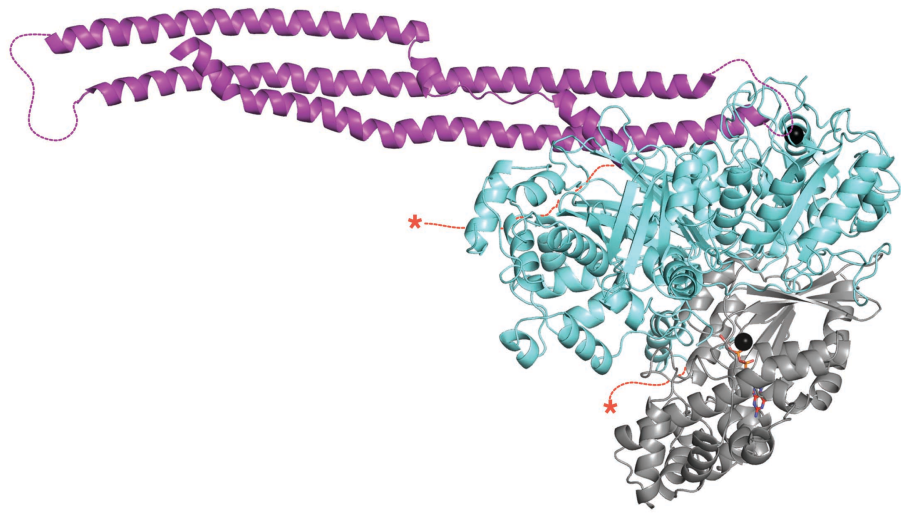

**b**

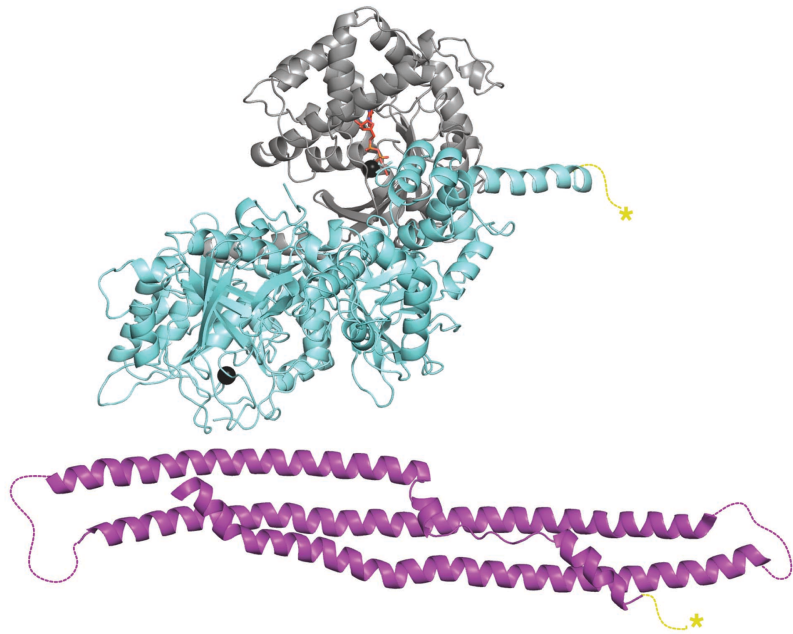

**c**

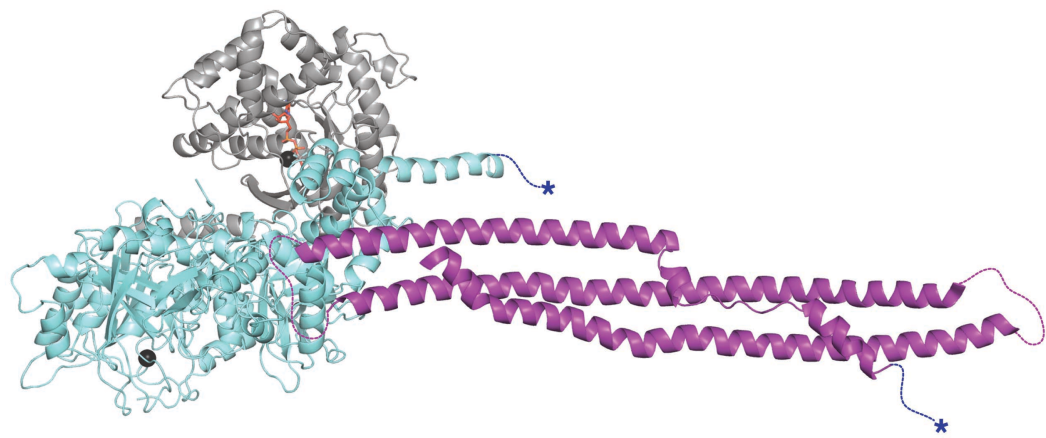

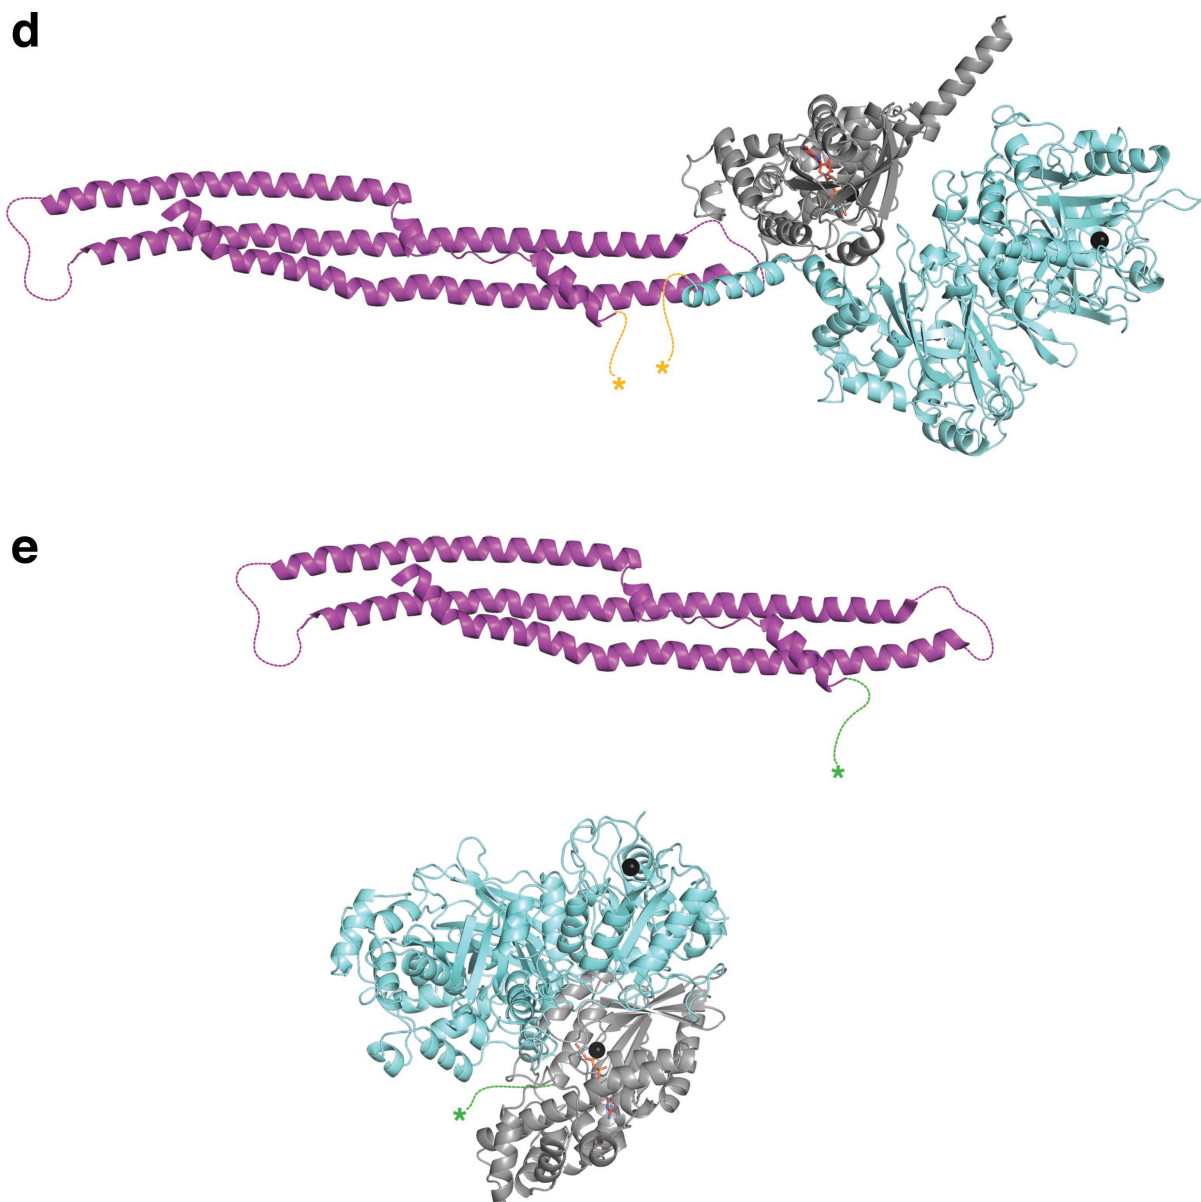

**Supplementary Figure 4.** Examples of possible PLC $\beta$ 3 core linkages with the distal CTD within the crystal lattice. The CTD linker is conformationally flexible, and it is unclear which PLC $\beta$ 3 core and distal CTD are covalently attached in the crystal lattice. Considering the length of the disordered linker (52 residues), there are many different combinations possible. Here we show only catalytic cores immediately adjacent to the distal CTD, which is drawn in the same orientation in each panel. These combinations are in addition to those shown in **Fig. 4**, which are configurations confirmed by cryo-EM. Activated G $\alpha_q$  is shown in gray, the GDP and AlF $_4^-$  as red sticks, and the Mg $^{2+}$  ion as a black sphere. The PLC $\beta$ 3 core is shown in cyan with the catalytic calcium ion as a black sphere. The distal CTD is shown in purple and the C-terminus is labeled. The C-terminus of the proximal CTD and the N-terminus of the distal CTD of each pair are marked by asterisks.

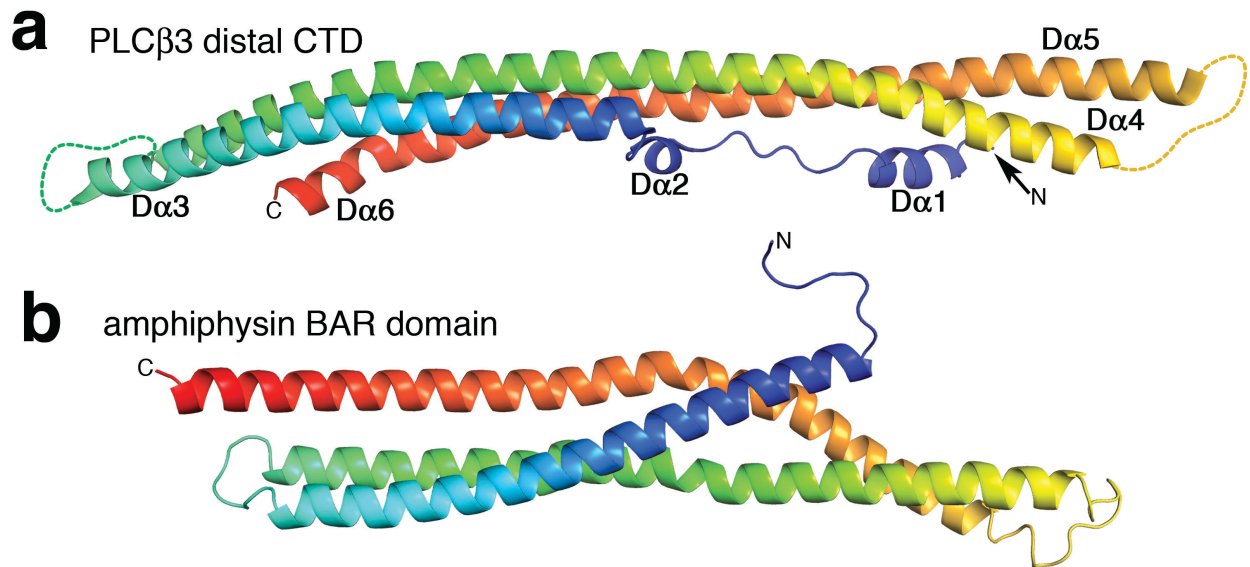

**Supplementary Figure 5.** The PLC $\beta$ 3 distal CTD and BAR domains are coiled coils with similar shape and topology. Both structures are viewed towards their putative membrane binding surfaces. Structural alignment was performed using PyMOL. **(a)** The PLC $\beta$ 3 distal CTD, colored in a ramp from blue at the N-terminus to red at the C-terminus. **(b)** Monomer of the amphiphysin BAR domain from *D. melanogaster* (PDB entry 1URU)<sup>35</sup>. The three core helices of the distal CTD and BAR domains (cyan to orange colored regions) adopt a similar fold, but the N- and C-terminal “arms” (blue and red regions, respectively) pack on opposite sides of the domain.



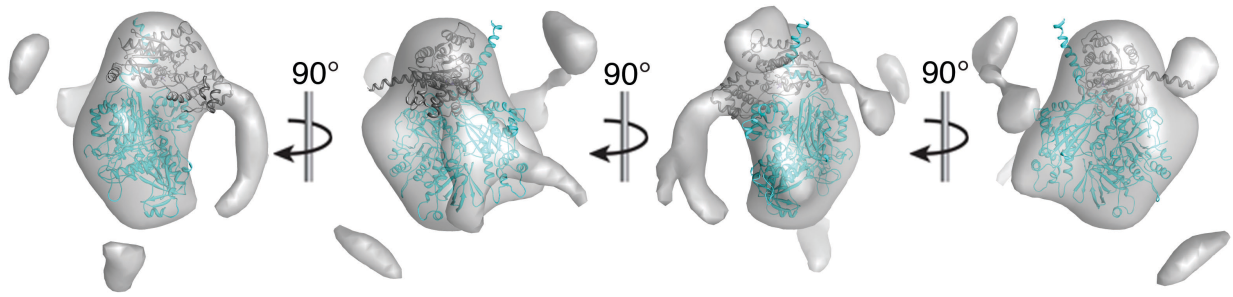

**Supplementary Figure 6.** Preliminary cryo-EM 3D reconstruction of the  $G\alpha_q$ -PLC $\beta_3$  complex. 40,124 particle projections were used to calculate a 3D reconstruction using the  $G\alpha_q$ -PLC $\beta_3$  core complex excluding the distal CTD as an initial reference volume. The map has poor definition and reveals several densities peripheral to the  $G\alpha_q$ -PLC $\beta_3$  core, but no clear location for the distal CTD.

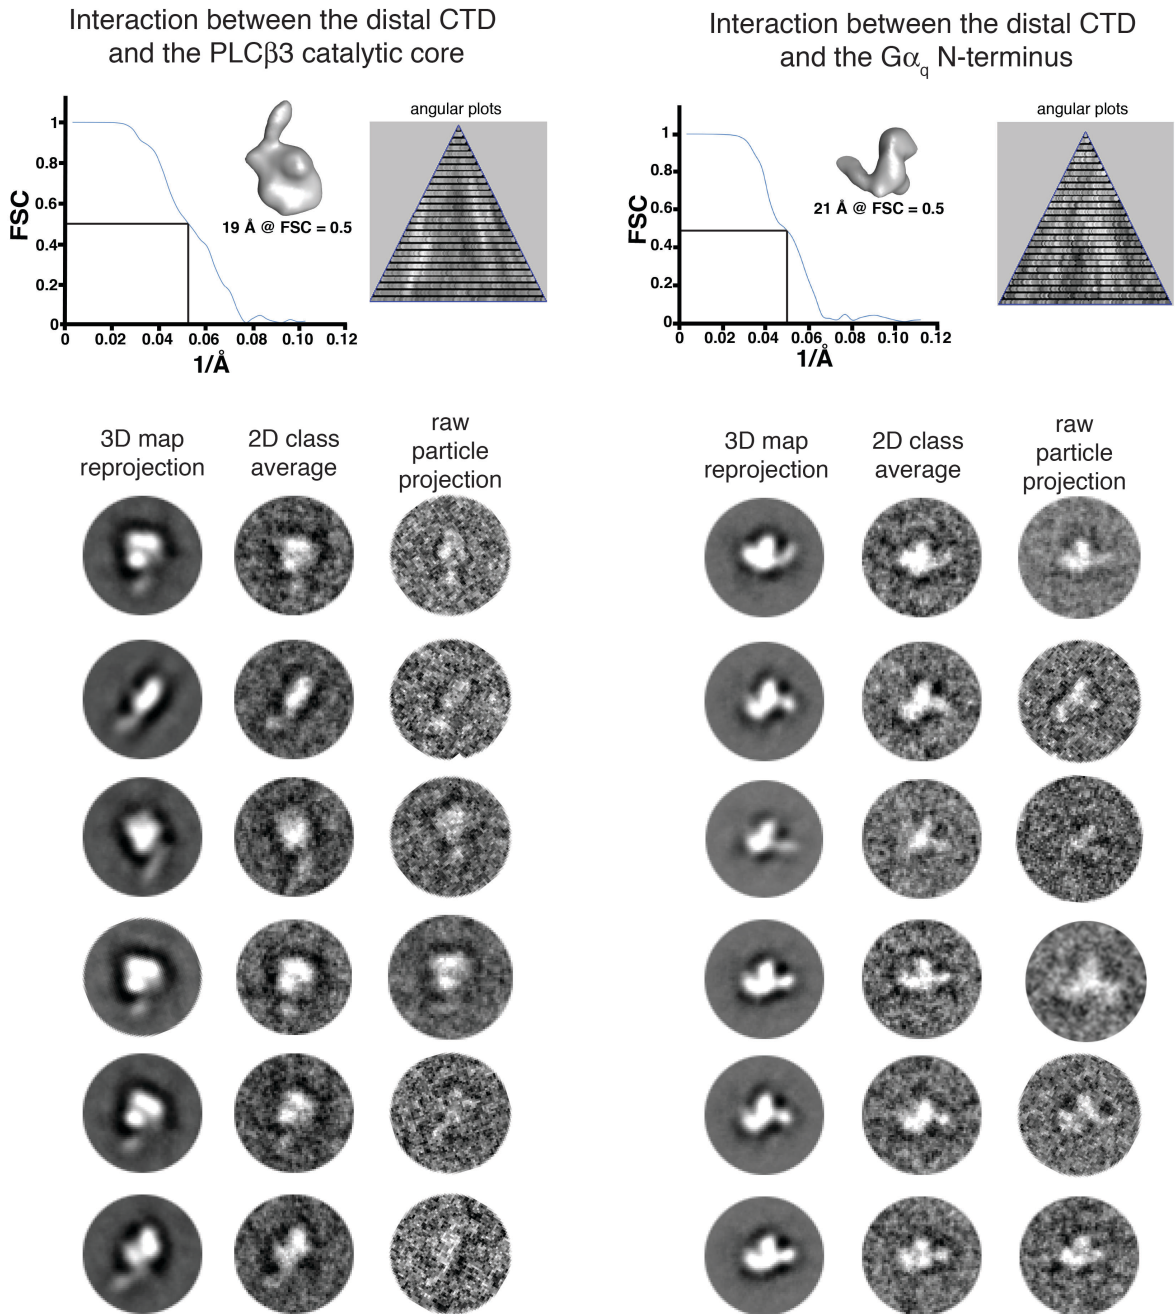

**Supplementary Figure 7.** Fourier shell correlation (FSC), angular distribution, and projection comparison for 3D reconstructions of the G $\alpha_q$ -PLC $\beta$ 3 complex. The FSC curve and angular distribution of particle projections reflecting the interaction between the distal CTD and the N-terminal helix of G $\alpha_q$ . **(a)** and interaction between the distal CTD and the PLC $\beta$ 3 catalytic core **(b)**. **(c)** Comparison of the 3D map reprojections, 2D class averages and raw particle projections for the distal CTD-G $\alpha_q$  N-terminal helix interface (left) and the **(d)** distal CTD-PLC $\beta$ 3 catalytic core interface (right).

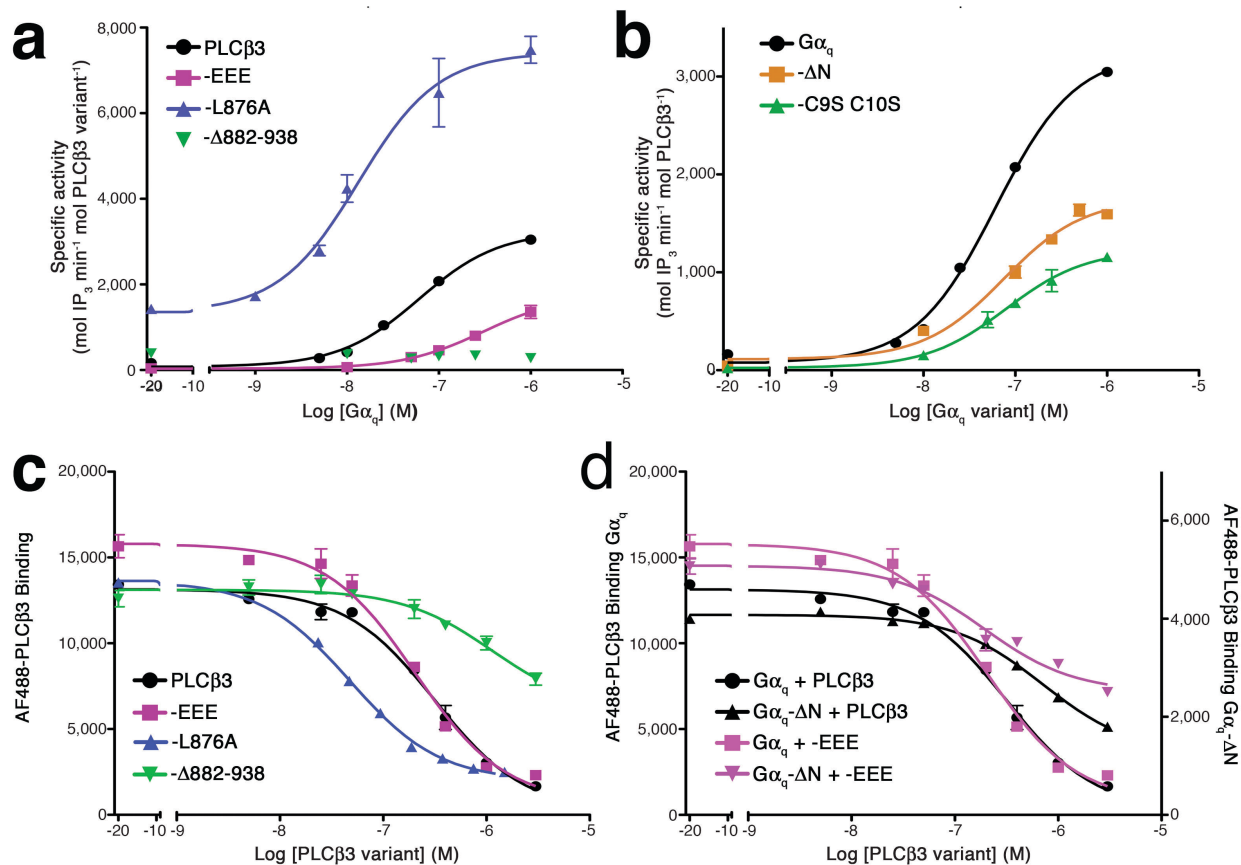

**Supplementary Figure 8.** Representative activation and competition binding curves. **(a)** Gα<sub>q</sub>-stimulated activation of PLCβ3 variants. The activity of PLCβ3 and variants in the presence of increasing amounts of GDP·AlF<sub>4</sub><sup>-</sup>-activated Gα<sub>q</sub> was determined by measuring the amount of free [<sup>3</sup>H]-IP<sub>3</sub> released from [<sup>3</sup>H]-PIP<sub>2</sub>-containing liposomes after 5 min at 30 °C. PLCβ3 (black circles), PLCβ3 L876A (blue triangles), and PLCβ3 EEE (dark pink squares) show robust Gα<sub>q</sub>-stimulated activation. PLCβ3-Δ882–938 (green inverted triangles) was unresponsive to Gα<sub>q</sub> at all concentrations tested. **(b)** Activation of PLCβ3 by Gα<sub>q</sub> variants. Representative activation curves for PLCβ3 activation by Gα<sub>q</sub> (black circles), Gα<sub>q</sub>-ΔN (orange squares), and Gα<sub>q</sub> C9S C10S (green triangles) are shown. All show similar EC<sub>50</sub> values, but differ in their maximum specific activity. Due to difficulty in obtaining sufficient quantities of Gα<sub>q</sub> variants, not all curves in (a) or (b) could be measured to saturation, thus introducing some uncertainty in determination of their midpoints. **(c)** Gα<sub>q</sub> binding of PLCβ3 variants. A flow cytometry bead-based assay was used to quantify the ability of PLCβ3 variants to displace an Alexa Fluor 488-labeled PLCβ3 variant (PLCβ3-Δ892 R9872A L876A L879A)<sup>19</sup> from biotinylated Gα<sub>q</sub> immobilized on streptavidin-coated beads. **(d)** The hydrophobic patch of the distal CTD does not contribute to high affinity binding. The ability of biotinylated Gα<sub>q</sub> or Gα<sub>q</sub>-ΔN to bind PLCβ3 (black circles and black triangles, respectively) or PLCβ3 EEE (pink squares and pink inverted triangles, respectively) was measured in the same flow cytometry based binding assay. Whenever possible, variants in (c) and (d) that did not plateau at the highest concentration of PLCβ3 were run in the same experiment with variants that did (*e.g.* L876A) in order to establish the baseline and allow more accurate determination of IC<sub>50</sub> values.

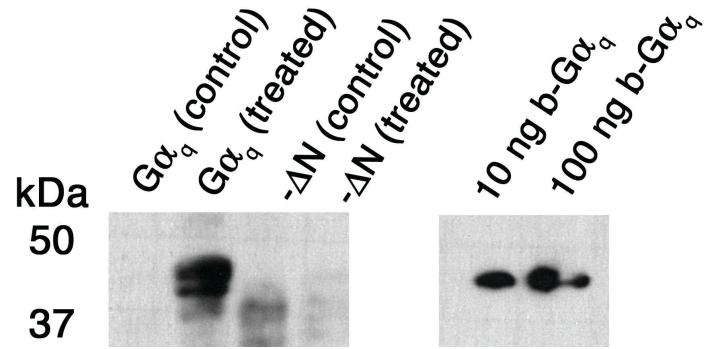

**Supplementary Figure 9.** Recombinantly expressed Gα<sub>q</sub> purified from the soluble fraction of High Five cells is at least partially palmitoylated. Gα<sub>q</sub> and Gα<sub>q</sub>-ΔN were treated with N-ethylmaleimide to block free thiols, followed by buffer (control samples) or hydroxylamine (treated) to remove thiol-linked palmitoyl groups. All samples were then incubated with a biotin cross-linking reagent that conjugated to the newly exposed thiol groups. Protection of cysteines due to palmitoylation was detected by a western blot with a biotin antibody. Biotinylated Gα<sub>q</sub> (b-Gα<sub>q</sub>) was used as a positive control.

## SUPPLEMENTARY NOTE

**Cryo-EM 3D Reconstructions.** 40,124 particle projections from  $G\alpha_q$ -PLC $\beta$ 3 images were interactively selected and excised using Boxer (EMAN 1.9 software suite)<sup>51</sup>. The CTF parameters for each micrograph were determined using *ctfit*, and CTF correction was applied accordingly using the program *Applyctf* (EMAN 1.9 software suite). In a first test, the full dataset of projections was used to determine a 3D reconstruction by projection matching in EMAN 1.9 using the structure of the  $G\alpha_q$ -PLC $\beta$ 3 core complex without the distal CTD as an initial reference. The resulting 3D map showed no clear density attributed to the distal CTD, but revealed significant peripheral density at various positions around the core complex (**Supplementary Fig. 6**). To probe the conformational heterogeneity in particle population, we subjected the particle projections to classification by the maximum likelihood approach as implemented in XMIPP<sup>58,59</sup>. However, this approach was unsuccessful, perhaps due to the multiple distinct conformations adopted by the distal CTD with respect to the  $G\alpha_q$ -PLC $\beta$ 3 core structure.

We then proceeded with multiple 3D reference-supervised classification by subjecting the full dataset to the “*multirefine*” routine<sup>60,61</sup> in EMAN 1.9 using as references 20 Å-filtered volumes of four possible models of the complex as observed in the crystal lattice (**Fig. 3**). In this way, four categories of particle projections were obtained according to maximum cross-correlation with the reprojections of the four crystal structure references. The total number of particles observed in each category is provided in **Fig. 3**.

In the next step, we used the unique particle datasets to calculate four independent 3D reconstructions using the same initial reference of the  $G\alpha_q$ -PLC $\beta$ 3 core but without the distal

CTD, thus simultaneously eliminating model bias for the distal CTD position and testing the validity of the classification (**Fig. 3**). Only two of the four reconstructions, each stemming from over 30% of the total dataset, showed very good definition for the shape of the  $G\alpha_q$ -PLC $\beta$ 3 core complex as well as additional significant elongated density attached to either  $G\alpha_q$  or the PLC $\beta$ 3 core. The agreement between these non-biased (for the CTD) reconstructions and the corresponding reference models we used initially during multiple-reference supervised classification confirms the validity of the methodology. Fourier shell correlation plots indicate that the two maps have resolutions of 19 and 21 Å (at FSC=0.5) for the interaction between the distal CTD and the  $G\alpha_q$  N-terminal helix, and between distal CTD and the PLC $\beta$ 3 core, respectively. Angular distribution plots for each reconstruction show a good coverage of Euler angles and there is a good agreement between the reprojections of each map, 2D class averages used for reconstruction, and raw particle projections (**Supplementary Fig. 7**).

## SUPPLEMENTARY NOTE REFERENCES

58. Marabini, R. *et al.* Xmipp: an image processing package for electron microscopy. *J Struct Biol* **116**, 237-40 (1996).
59. Scheres, S.H., Nunez-Ramirez, R., Sorzano, C.O., Carazo, J.M. & Marabini, R. Image processing for electron microscopy single-particle analysis using XMIPP. *Nat Protoc* **3**, 977-90 (2008).
60. Brink, J. *et al.* Experimental verification of conformational variation of human fatty acid synthase as predicted by normal mode analysis. *Structure* **12**, 185-91 (2004).
61. Menetret, J.F. *et al.* Architecture of the ribosome-channel complex derived from native membranes. *J Mol Biol* **348**, 445-57 (2005).
